# Supplementary material for: The International Trade of Ware Vegetables and Orna-Mental Plants—An Underestimated Risk of Accelerated Spreading of Phytopathogenic Bacteria in the Era of Globalisation and Ongoing Climatic Changes
Source: MDPI journal article supplement (doi:10.3390/pathogens11070728), 2022-06-26
Supplement: s1 [file s1]

**Table S1.** Results of pathogenicity tests.

| Strain                              | Host             | Mean diameter of rotting<br>potato tissue<br>± Standard Deviation<br>[mm] | Mean surface area of rotting<br>chicory tissue<br>± Standard Deviation<br>[cm <sup>2</sup> ] |
|-------------------------------------|------------------|---------------------------------------------------------------------------|----------------------------------------------------------------------------------------------|
| <i>Pectobacterium atrosepticum</i>  |                  |                                                                           |                                                                                              |
| DPMP134                             | Potato tuber     | 20.7 ± 1.5                                                                | 17.2 ± 1.7                                                                                   |
| DPMP634                             | Potato tuber     | 15.7 ± 4.5                                                                | 0.9 ± 0.5                                                                                    |
| <b>*IFB5050</b>                     | Potato stem      | 20.2 ± 1.0                                                                | 27.1 ± 1.2                                                                                   |
| <b>*IFB5205</b>                     | Potato stem      | 24.0 ± 1.7                                                                | nt                                                                                           |
| <b>*ICMP1526<sup>T</sup></b>        | Potato stem      | 8.6 ± 1.3                                                                 | 0                                                                                            |
| <i>Pectobacterium brasiliense</i>   |                  |                                                                           |                                                                                              |
| DPMP224                             | Potato tuber     | 12.3 ± 1.6                                                                | 11.2 ± 1.3                                                                                   |
| DPMP374                             | Potato tuber     | 21.3 ± 0.6                                                                | 16.2 ± 0.6                                                                                   |
| DPMP396                             | Bittersweet      | 15.7 ± 1.0                                                                | 38.1 ± 0.9                                                                                   |
| DPMP55                              | Potato tuber     | 21.0 ± 4.6                                                                | 14.1 ± 1.1                                                                                   |
| <b>*IFB5258</b>                     | Sugar Beet       | 15.7 ± 1.0                                                                | 2.1 ± 0.1                                                                                    |
| <b>*IFB5369</b>                     | Potato tuber     | 21.0 ± 2.0                                                                | 16.91 ± 0.9                                                                                  |
| <b>* LMG2137<sup>T</sup></b>        | Potato tuber     | 13.0 ± 1.0                                                                | 10.6 ± 0.4                                                                                   |
| <i>Pectobacterium carotovorum</i>   |                  |                                                                           |                                                                                              |
| DPMP189                             | Potato tuber     | 19.7 ± 1.6                                                                | 13.2 ± 0.4                                                                                   |
| DPMP199                             | Potato tuber     | 14.0 ± 2.6                                                                | 17.4 ± 0.7                                                                                   |
| DPMP200                             | Potato tuber     | 17.9 ± 1.0                                                                | 37.7 ± 0.9                                                                                   |
| DPMP399                             | Sugar beet       | 22.0 ± 0.9                                                                | 23.1 ± 0.6                                                                                   |
| <b>*DPMP510</b>                     | Potato stem      | 13.0 ± 0.9                                                                | 11.4 ± 0.6                                                                                   |
| <b>*LMG2401</b>                     | Carrot           | 6.0 ± 1.0                                                                 | nt                                                                                           |
| <b>*LMG2404<sup>T</sup></b>         | Potato           | 12.6 ± 0.9                                                                | 0                                                                                            |
| <i>Pectobacterium parmentieri</i>   |                  |                                                                           |                                                                                              |
| DPMP136                             | Potato tuber     | 15.7 ± 0.7                                                                | 25.7 ± 1.9                                                                                   |
| <b>*IFB5322</b>                     | Potato stem      | 17.6 ± 0.4                                                                | 0                                                                                            |
| <b>*SCC3193</b>                     | Potato           | 30.0 ± 1.2                                                                | 1.9 ± 0.1                                                                                    |
| <i>Pectobacterium parvum</i>        |                  |                                                                           |                                                                                              |
| DPMP20                              | Potato           | 23.4 ± 0.5                                                                | 38.5 ± 1.6                                                                                   |
| <b>*IFB5220</b>                     | Potato stem      | 15.4 ± 2.4                                                                | 39.5 ± 3.5                                                                                   |
| <b>*s421<sup>T</sup></b>            | Potato           | 14.3 ± 2.3                                                                | nt                                                                                           |
| <i>Pectobacterium odoriferum</i>    |                  |                                                                           |                                                                                              |
| DPMP293                             | Celery           | 19.2 ± 4.0                                                                | 13.7 ± 1.1                                                                                   |
| <b>*IFB5295</b>                     | Carrot           | 16.2 ± 0.4                                                                | 11.7 ± 2.0                                                                                   |
| <b>*CFBP1878<sup>T</sup></b>        | Chicory          | 11.6 ± 0.8                                                                | 9.5 ± 1.8                                                                                    |
| <i>Pectobacterium polaris</i>       |                  |                                                                           |                                                                                              |
| DPMP286                             | Potato           | 19.2 ± 4.7                                                                | 36.2 ± 3.7                                                                                   |
| DPMP380                             | Sugar beet       | 12.5 ± 2.5                                                                | 26.8 ± 1.9                                                                                   |
| DPMP397                             | Bittersweet      | 8.7 ± 0.6                                                                 | 8.6 ± 1.0                                                                                    |
| DPMP403                             | Sugar beet       | 22.2 ± 2.4                                                                | 12.4 ± 1.8                                                                                   |
| <b>*IFB5222</b>                     | Potato stem      | 10.6 ± 1.0                                                                | 36.2 ± 5.8                                                                                   |
| <b>*NIBIO1006<sup>T</sup></b>       |                  | 12.5 ± 4.4                                                                | 42.5 ± 4.5                                                                                   |
| <i>Pectobacterium versatile</i>     |                  |                                                                           |                                                                                              |
| DPMP204                             | Potato           | 22.0 ± 4.0                                                                | 21.8 ± 2.9                                                                                   |
| DPMP387                             | Red beet         | 16.3 ± 4.7                                                                | 29.7 ± 3.1                                                                                   |
| DPMP335                             | Peppers felepano | 25.5 ± 3.0                                                                | 24.7 ± 3.9                                                                                   |
| DPMP248                             | Potato           | 18.9 ± 2.3                                                                | 16.5 ± 2.2                                                                                   |
| DPMP337                             | Fennel           | 19.3 ± 2.4                                                                | 13.1 ± 2.9                                                                                   |
| DPMP198                             | Cactus           | 22.1 ± 2.4                                                                | 17.8 ± 2.4                                                                                   |
| DPMP633                             | Potato tuber     | 19.3 ± 2.7                                                                | 6.9 ± 1.0                                                                                    |
| <b>*IFB5169</b>                     | Potato stem      | 35.4 ± 3.0                                                                | 0                                                                                            |
| <b>*SCC1</b>                        |                  | 14.0 ± 1.0                                                                | 21.8 ± 3.4                                                                                   |
| <i>Pectobacterium zantedeschiae</i> |                  |                                                                           |                                                                                              |
| <b>9M<sup>T</sup> = DPMP423</b>     | Calla lilly      | 21.9 ± 1.2                                                                | 24.6 ± 10.4                                                                                  |
| <i>Dickeya dadantii</i>             |                  |                                                                           |                                                                                              |
| DPMP625                             |                  | 21.6 ± 1.3                                                                | 0                                                                                            |
| <b>* 3937<sup>T</sup></b>           |                  | 25.0 ± 5.0                                                                | 13.06 ± 2.4                                                                                  |
| <i>Negative control</i>             |                  |                                                                           |                                                                                              |
|                                     |                  | 0                                                                         | 0                                                                                            |

\* reference strains and strains that were isolated from plants with disease symptoms

<sup>T</sup> – Type Strain

**Table S2.** Comparison of the potato tissue maceration ability of the 27 strains isolated from asymptomatic plant samples in contrast to 17 strains originating from plants with disease symptoms. Strains abbreviations: \* strains isolated from symptomatic plants, <sup>T</sup> - type strains. Means  $\pm$  SD of diameters of the rotten tissues is depicted. Three independent experiments with nine technical replications were conducted. Means marked with a different letter (a, b, c, ... p) are significantly different according to the Games-Howell test followed by a post-hoc analysis applying Welch and Brown-Forsythe corrections for nonhomogeneous variances criterion at  $p < 0.02$ .

|              | x                |
|--------------|------------------|
| * CFBP1878T  | abcdef           |
| * DPMP510    | abcdegh          |
| * ICMP1526 T | acfg             |
| * IFB5050    | ijklmno          |
| * IFB5169    | abcdefghijklmnop |
| * IFB5205    | ijklmp           |
| * IFB5222    | abcdf            |
| * IFB5258    | cdeghijmno       |
| * IFB5295    | cdeghijkn        |
| * IFB5322    | ghijkn           |
| * IFB5369    | bdehijklmnop     |
| * LMG2137 T  | abcdegh          |
| * LMG2404    | abcdegh          |
| * s421T      | abcdefghijklmno  |
| * SCC3193    | p                |
| *LMG2401     | f                |
| *NIBIO1006T  | abcdefghijklmnop |
| *SCC1        | abcdeghjn        |
| 9MT          | iklm             |
| DPMP134      | ehijklmno        |
| DPMP136      | cdeghijn         |
| DPMP189      | ehijklmno        |
| DPMP198      | abcdeghijklmnop  |
| DPMP199      | abcdefghijklmnop |
| DPMP20       | lp               |
| DPMP200      | hijklmno         |
| DPMP204      | abcdefghijklmnop |
| DPMP224      | abcdeghno        |
| DPMP248      | abcdefghijklmnop |
| DPMP286      | abcdefghijklmnop |
| DPMP293      | abcdefghijklmnop |
| DPMP335      | abcdefghijklmnop |
| DPMP337      | abcdefghijklmnop |
| DPMP353      | ijklmno          |
| DPMP374      | lmo              |
| DPMP380      | abcdefghijklmnop |
| DPMP387      | abcdefghijklmnop |

|          |                 |
|----------|-----------------|
| DPMP396  | cdeghijkn       |
| DPMP397  | abf             |
| DPMP399  | kl              |
| DPMP403  | abcdeghijklmnop |
| DPMP511  | abcdeghijklmnop |
| DPMP55   | abcdeghijklmnop |
| DPMP625  | ijklm           |
| DPMP633  | abcdeghijklmnop |
| DPMP634  | abcdeghijklmnop |
| * 3937 T | abcdeghijklmnop |

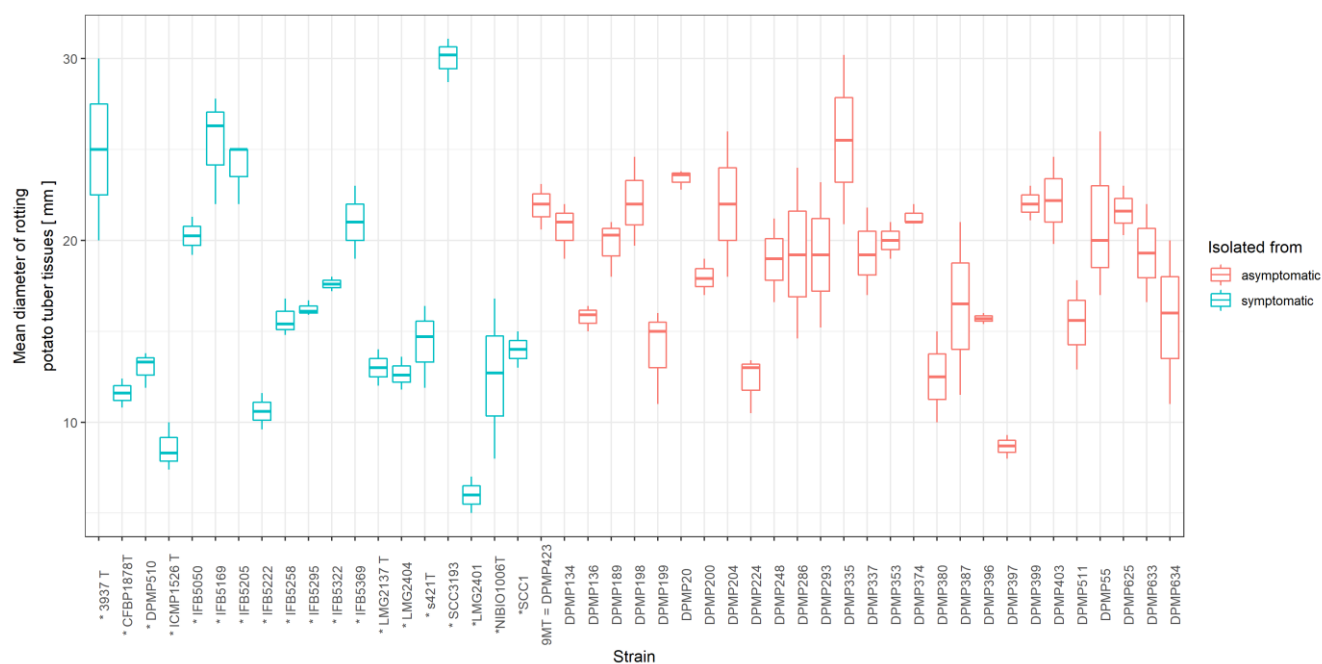

**Figure S1.** Comparison of the potato tissue maceration ability of the 26 strains isolated from asymptomatic plant samples in contrast to 21 strains originating from plants with disease symptoms. Strains abbreviations: \* strains isolated from symptomatic plants, <sup>T</sup> - type strains.

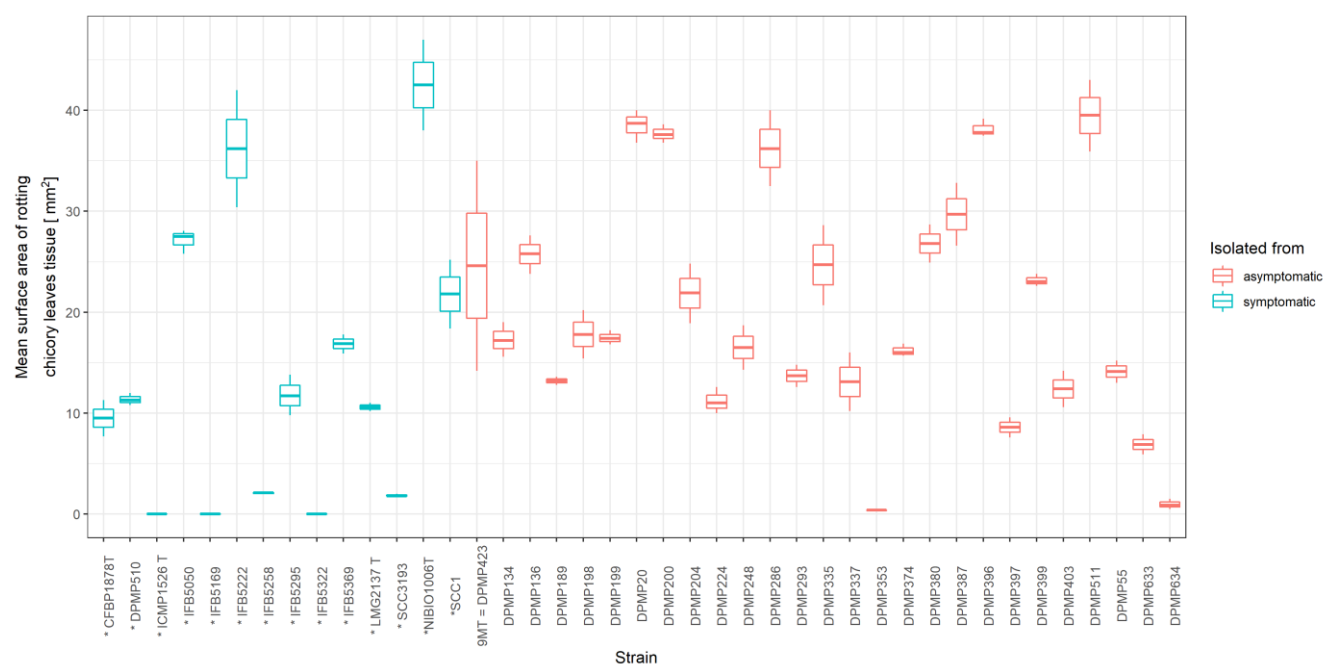

**Figure S2.** Comparison of the chicory tissue maceration ability of the 26 strains isolated from asymptomatic plant samples in contrast to 18 strains originating from plants with disease symptoms. Strains abbreviations: \* strains isolated from symptomatic plants, T - type strains.
